# Supplementary material for: Social Context, HIV Stigma, and Discrimination in Indonesian Healthcare Settings: a National Survey
Source: Research Square preprint supplement (doi:10.21203/rs.3.rs-8380565/v1), 2026-01-19
Supplement: Supplementary file 1 [file 8e3e30e74595eaf18c6e4661.docx]

Table S1. HIV stigma, discrimination, and social context measures.

| Statements | Definition |
| --- | --- |
| HIV stigma |  |
| - Most PLHIV do not care that they could infect other people. - PLHIV should be ashamed of their HIV status. - People get infected with HIV because they engage in irresponsible/immoral behaviours. - A woman who is HIV positive should be sterilised even though she doesn’t want to. | ‘Agree’ or ‘Strongly agree’ to any of these statements. |
| HIV discrimination   - Wear double gloves. - Use any special infection control/prevention measures with patients living with HIV or AIDS that you do not use with other patients. | Responded ‘Yes’ to having done any of these practices. Only asked to healthcare professionals. |
| Social context: Witnessing discriminatory practice at the workplace | |
| Ever seen coworkers unwilling to care for patients who are:   - PLHIV - Gay or suspected to be gay - Transgender or suspected to be transgender - Sex worker or suspected to be a sex worker - Drug users or suspected of being a drug user | Responded ‘Yes’ to witnessing any of these refusals. |
| Social context: Perceived norms at the workplace   - In this health facility, it is not acceptable to perform the blood test for HIV without a patient’s knowledge or consent. - In this health facility, I will get in trouble (or have negative impacts on my job) if I discriminate against patients living with HIV or AIDS. | ‘Agree’ or ‘Strongly agree’ to any of these statements. |
